# Supplementary material for: Acid–base properties of the N3 ruthenium(ii) solar cell sensitizer: a combined experimental and computational analysis
Source: Royal Society of Chemistry journal article supplement (doi:10.1039/c2dt31340e), 2012-01-01
Supplement: c2dt31340e.pdf [file c2dt31340e.pdf]

## Electronic Supplementary Information

### Acid-base properties of the N3 Ruthenium(II) solar cell sensitizer: A combined experimental and computational analysis

Giuliano Pizzoli,<sup>a</sup> Maria Grazia Lobello,<sup>a,b</sup> Benedetta Carlotti,<sup>a</sup> Fausto Elisei,<sup>a</sup> Mohammad K. Nazeeruddin,<sup>c</sup> Giuseppe Vitillaro<sup>b</sup> and Filippo De Angelis<sup>b,\*</sup>

**Table S1.** HOMOs and LUMOs energies (eV) of N3Hx molecules in water solution.

|     | N3H <sub>4</sub> | N3H <sub>3</sub> <sup>-</sup> |       | N3H <sub>2</sub> <sup>2-</sup> |       |       |       | N3H <sup>3-</sup> |       | N3 <sup>4-</sup> |
|-----|------------------|-------------------------------|-------|--------------------------------|-------|-------|-------|-------------------|-------|------------------|
|     |                  | A                             | B     | A                              | B     | C     | D     | A                 | B     |                  |
| H-6 | -6.98            | -6.76                         | -6.77 | -6.65                          | -6.65 | -6.64 | -6.67 | -6.39             | -6.39 | -6.35            |
| H-5 | -6.86            | -6.73                         | -6.74 | -6.41                          | -6.43 | -6.42 | -6.46 | -6.38             | -6.38 | -6.35            |
| H-4 | -6.84            | -6.45                         | -6.46 | -6.40                          | -6.42 | -6.42 | -6.46 | -6.37             | -6.38 | -6.34            |
| H-3 | -6.29            | -6.25                         | -6.25 | -6.21                          | -6.21 | -6.21 | -6.20 | -6.16             | -6.17 | -6.11            |
| H-2 | -5.90            | -5.82                         | -5.82 | -5.73                          | -5.72 | -5.71 | -5.73 | -5.62             | -5.61 | -5.50            |
| H-1 | -5.87            | -5.78                         | -5.79 | -5.68                          | -5.68 | -5.66 | -5.69 | -5.57             | -5.57 | -5.45            |
| H   | -5.65            | -5.57                         | -5.54 | -5.46                          | -5.45 | -5.47 | -5.44 | -5.33             | -5.35 | -5.23            |
| L   | -3.16            | -3.07                         | -3.05 | -2.99                          | -2.86 | -2.89 | -2.84 | -2.76             | -2.77 | -2.35            |
| L+1 | -3.07            | -2.87                         | -2.87 | -2.50                          | -2.79 | -2.74 | -2.82 | -2.38             | -2.39 | -2.29            |
| L+2 | -2.62            | -2.54                         | -2.54 | -2.43                          | -2.13 | -2.15 | -2.14 | -2.07             | -2.07 | -1.58            |
| L+3 | -2.58            | -2.19                         | -2.17 | -2.06                          | -2.10 | -1.70 | -2.10 | -1.67             | -1.64 | -1.53            |
| L+4 | -2.22            | -2.07                         | -2.10 | -1.64                          | -1.72 | -1.60 | -1.74 | -1.57             | -1.58 | -1.51            |
| L+5 | -2.07            | -1.69                         | -1.69 | -1.54                          | -1.57 | -0.53 | -1.54 | -1.43             | -1.46 | -1.34            |
| L+6 | -0.79            | -0.69                         | -0.68 | -0.62                          | -0.52 | -0.39 | -0.52 | -0.41             | -0.42 | -0.12            |

**Table S2.** Values of  $\Delta G_{vac}$  (kcal/mol),  $\Delta\Delta G_{solv}$  (kcal/mol) of the N3 complexes and calculated pK<sub>a</sub>s using different computational methods.

|                                                                  | $\Delta g_{vac}$ | $\Delta\Delta G_{sol}$<br>UA0 | pKa<br>UA0 | $\Delta\Delta G_{sol}$<br>SPH | pKa<br>SPH | $\Delta\Delta G_{sol}$<br>UAHF | pKa<br>UAHF |
|------------------------------------------------------------------|------------------|-------------------------------|------------|-------------------------------|------------|--------------------------------|-------------|
| N3H <sub>4</sub> /N3H <sub>3</sub> <sup>-</sup> A                | 310.62           | -34.68                        | 5.55       | -40.01                        | 1.64       | -38.56                         | 2.71        |
| N3H <sub>4</sub> /N3H <sub>3</sub> <sup>-</sup> B                | 308.21           | -31.77                        | 5.91       | -37.16                        | 1.96       | -35.6                          | 3.11        |
| N3H <sub>3</sub> <sup>-</sup> A/N3H <sub>2</sub> <sup>2-</sup> A | 349.78           | -72.37                        | 6.63       | -77.78                        | 2.66       | -75                            | 4.70        |
| N3H <sub>3</sub> <sup>-</sup> A/N3H <sub>2</sub> <sup>2-</sup> B | 345.09           | -67.04                        | 7.09       | -72.66                        | 2.97       | -69.87                         | 5.02        |
| N3H <sub>3</sub> <sup>-</sup> A/N3H <sub>2</sub> <sup>2-</sup> C | 344.80           | -67.29                        | 6.70       | -72.61                        | 2.80       | -70.03                         | 4.69        |
| N3H <sub>3</sub> <sup>-</sup> B/N3H <sub>2</sub> <sup>2-</sup> A | 352.19           | -75.28                        | 6.26       | -80.63                        | 2.34       | -77.96                         | 4.30        |
| N3H <sub>3</sub> <sup>-</sup> B/N3H <sub>2</sub> <sup>2-</sup> D | 346.42           | -68.57                        | 6.95       | -74.03                        | 2.95       | -71.23                         | 5.00        |
| N3H <sub>2</sub> <sup>2-</sup> A/N3H <sup>3-</sup> A             | 383.57           | -103.80                       | 8.35       | -109.24                       | 4.37       | -106.17                        | 6.62        |
| N3H <sub>2</sub> <sup>2-</sup> A/N3H <sup>3-</sup> B             | 381.65           | -101.92                       | 8.32       | -107.34                       | 4.35       | -104.53                        | 6.41        |
| N3H <sub>2</sub> <sup>2-</sup> B/N3H <sup>3-</sup> A             | 388.26           | -109.13                       | 7.89       | -114.36                       | 4.05       | -111.3                         | 6.30        |
| N3H <sub>2</sub> <sup>2-</sup> C/N3H <sup>3-</sup> B             | 386.63           | -107.00                       | 8.25       | -112.51                       | 4.21       | -109.5                         | 6.42        |
| N3H <sub>2</sub> <sup>2-</sup> D/N3H <sup>3-</sup> A             | 389.34           | -110.51                       | 7.67       | -115.84                       | 3.74       | -112.9                         | 5.91        |
| N3H <sup>3-</sup> A/N3 <sup>4-</sup>                             | 424.15           | -143.27                       | 9.17       | -148.62                       | 5.24       | -145.49                        | 7.54        |
| N3H <sup>3-</sup> B/N3 <sup>4-</sup>                             | 426.06           | -145.15                       | 9.19       | -150.52                       | 5.26       | -147.13                        | 7.74        |

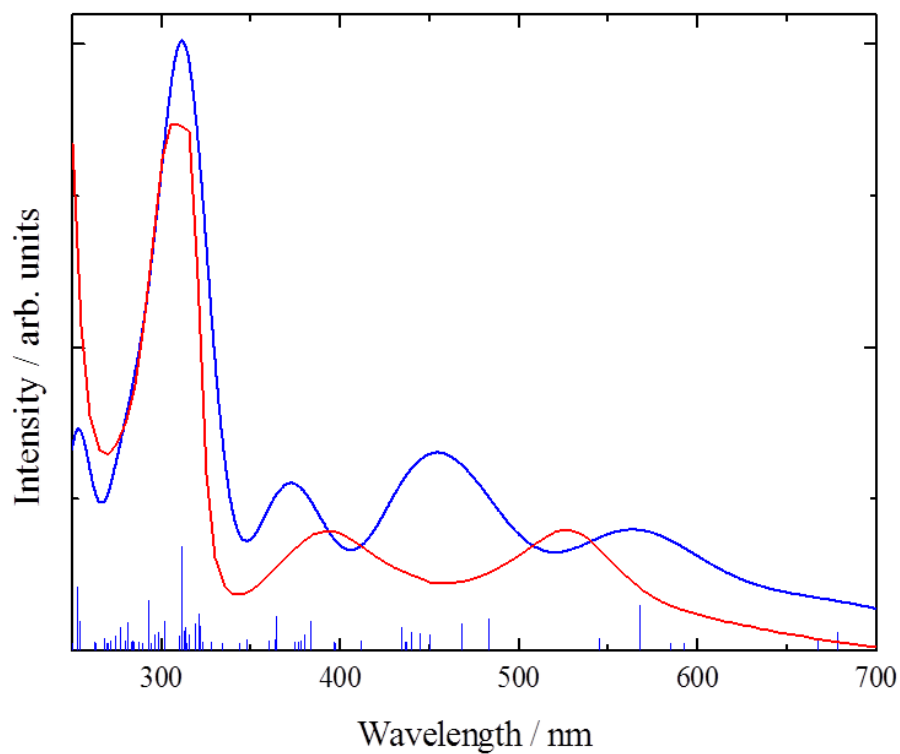

**Figure S1.** Comparison between computed (blue line) and experimental (red line) spectrum of  $\text{N3H}_4$ . Blue vertical lines correspond to calculated excitation energies and oscillator strengths for  $\text{N3H}_4$ .

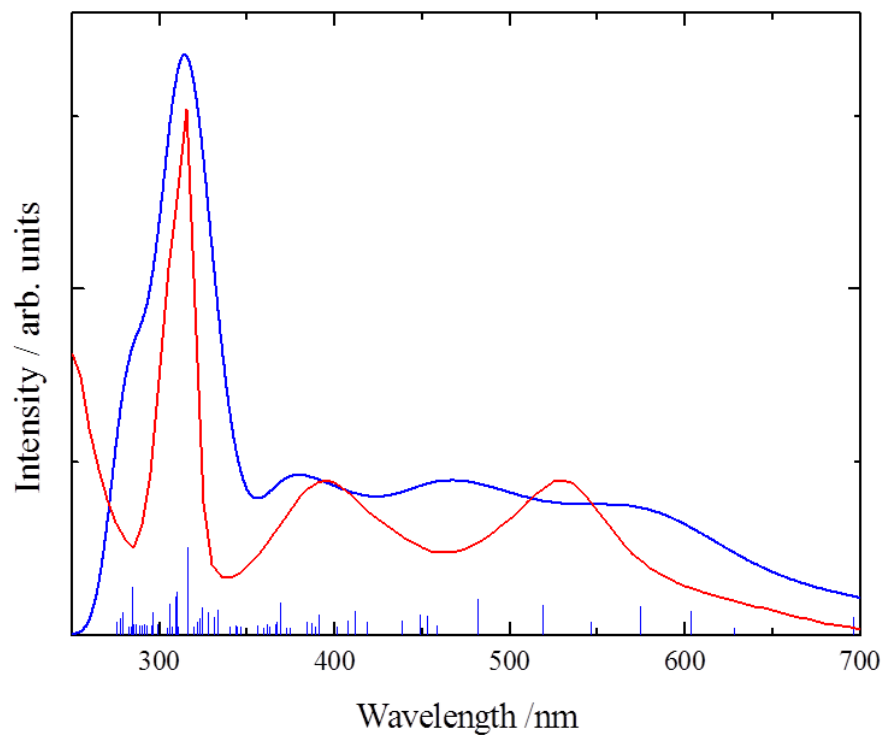

**Figure S2.** Comparison between computed (blue line) and experimental (red line) spectrum of  $\text{N3H}_3^-_A$ . Blue vertical lines correspond to calculated excitation energies and oscillator strengths for  $\text{N3H}_3^-_A$ .

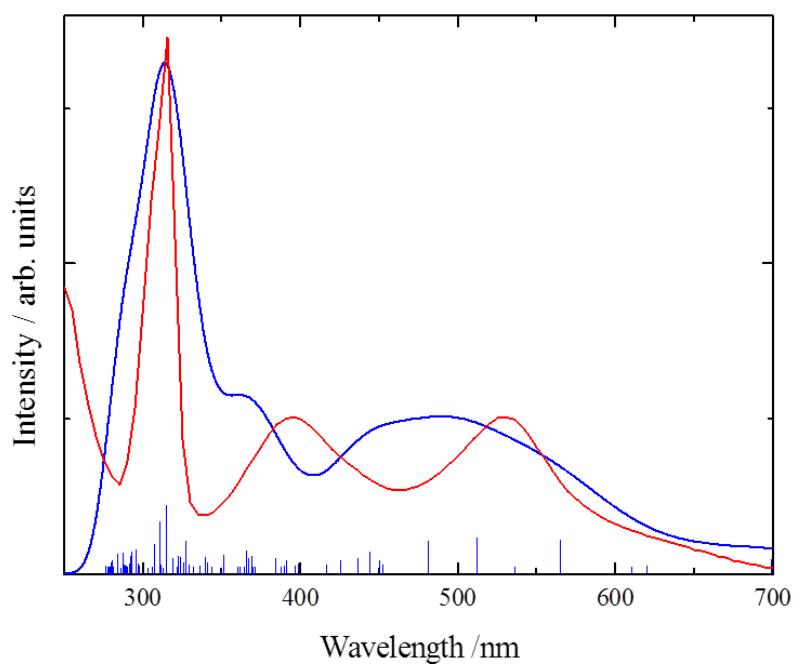

**Figure S3.** Comparison between computed (blue line) and experimental (red line) spectrum of  $\text{N3H}_3^- \text{B}$ . Blue vertical lines correspond to calculated excitation energies and oscillator strengths for  $\text{N3H}_3^- \text{B}$ .

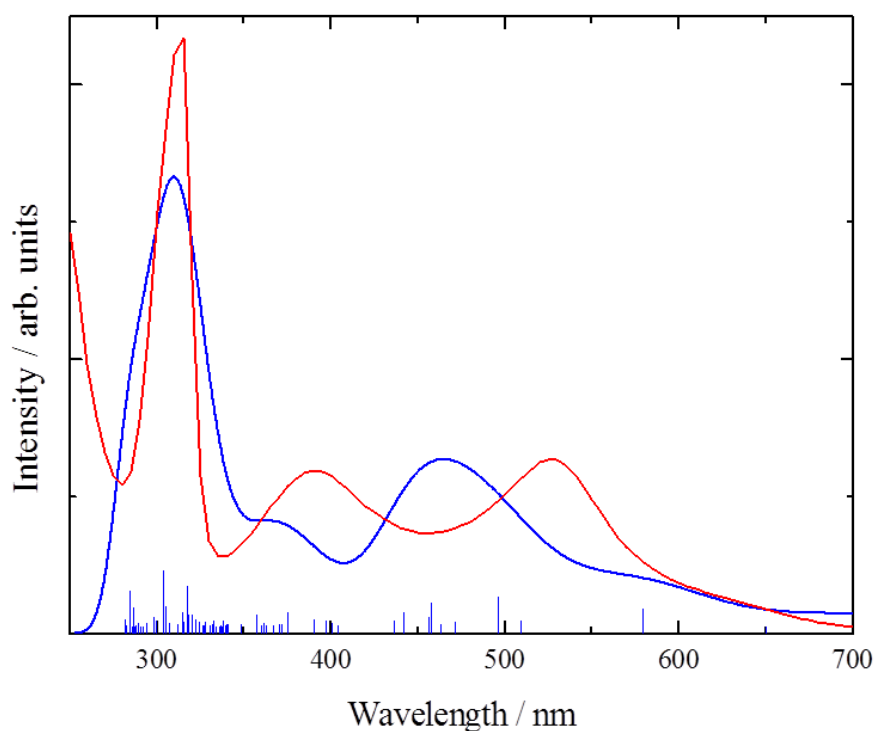

**Figure S4.** Comparison between computed (blue line) and experimental (red line) spectrum of  $\text{N3H}_2^{2-} \text{A}$ . Blue vertical lines correspond to calculated excitation energies and oscillator strengths for  $\text{N3H}_2^{2-} \text{A}$ .

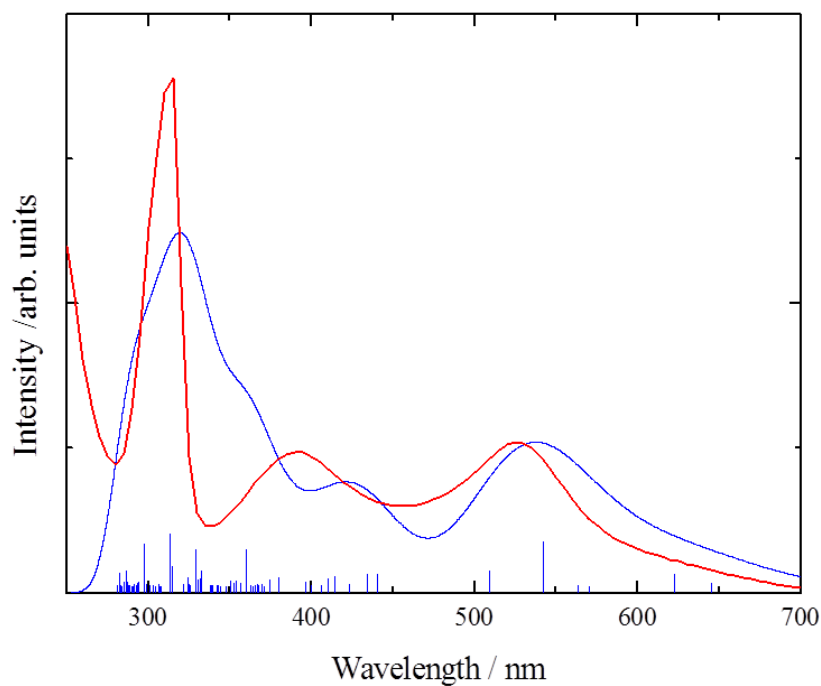

**Figure S5.** Comparison between computed (blue line) and experimental (red line) spectrum of  $\text{N3H}_2^{2-}_B$ . Blue vertical lines correspond to calculated excitation energies and oscillator strengths for  $\text{N3H}_2^{2-}_B$ .

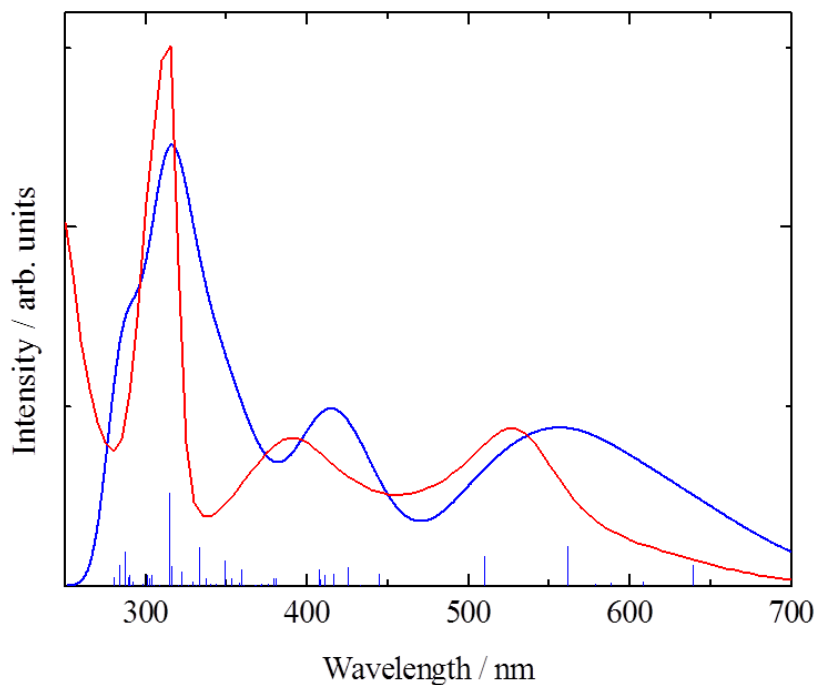

**Figure S6.** Comparison between computed (blue line) and experimental (red line) spectrum of  $\text{N3H}_2^{2-}_C$ . Blue vertical lines correspond to calculated excitation energies and oscillator strengths for  $\text{N3H}_2^{2-}_C$ .

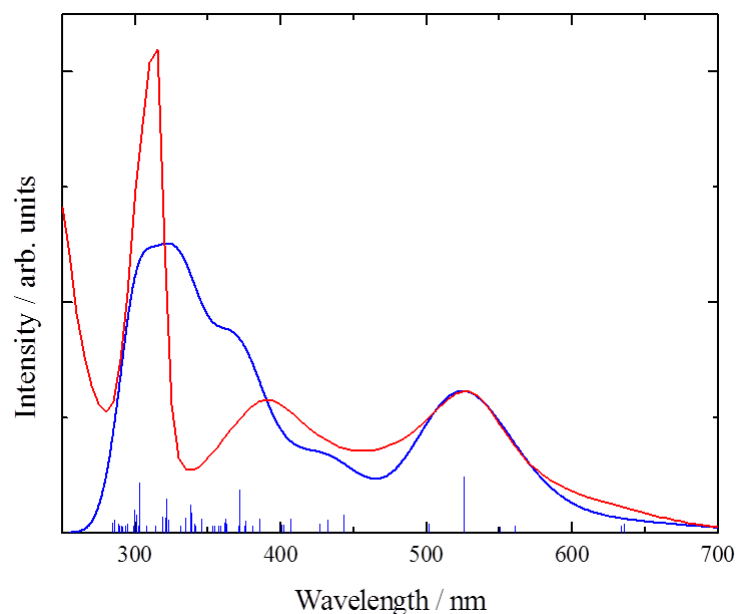

**Figure S7.** Comparison between computed (blue line) and experimental (red line) spectrum of  $\text{N3H}_2^{2-}\text{D}$ . Blue vertical lines correspond to calculated excitation energies and oscillator strengths for  $\text{N3H}_2^{2-}\text{D}$ .

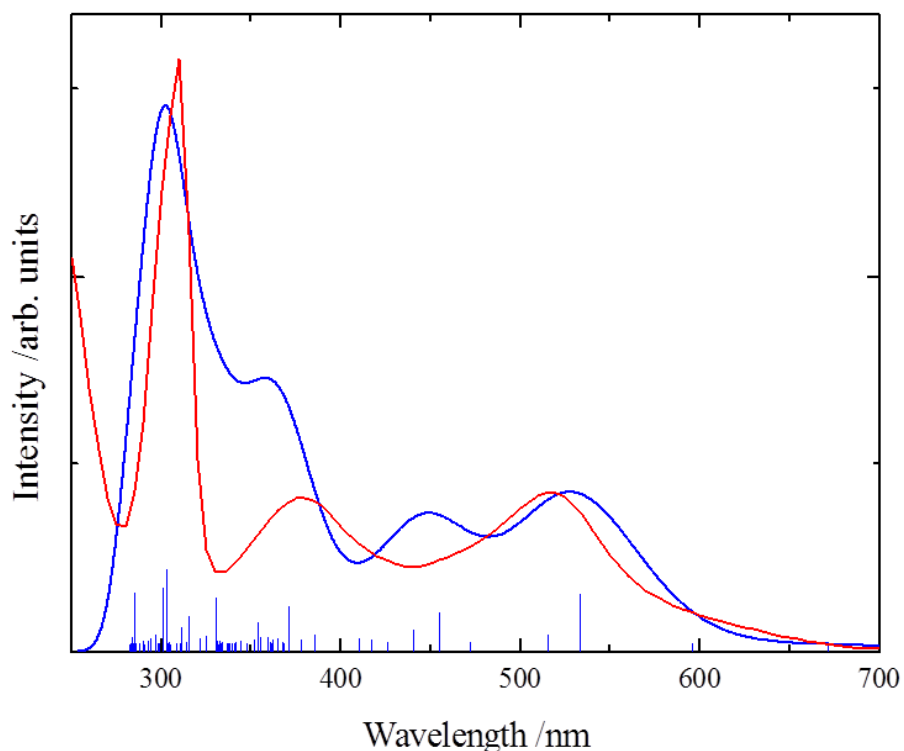

**Figure S8.** Comparison between computed (blue line) and experimental (red line) spectrum of  $\text{N3H}^{3-}\text{A}$ . Blue vertical lines correspond to calculated excitation energies and oscillator strengths for  $\text{N3H}^{3-}\text{A}$ .

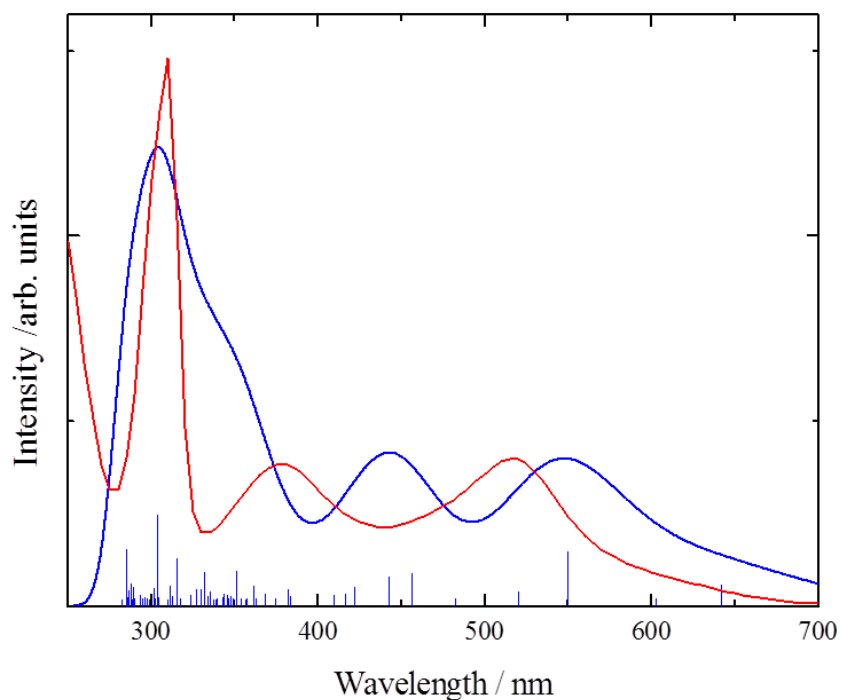

**Figure S9.** Comparison between computed (blue line) and experimental (red line) spectrum of  $\text{N3H}^{3+}_B$ . Blue vertical lines correspond to calculated excitation energies and oscillator strengths for  $\text{N3H}^{3+}_B$ .

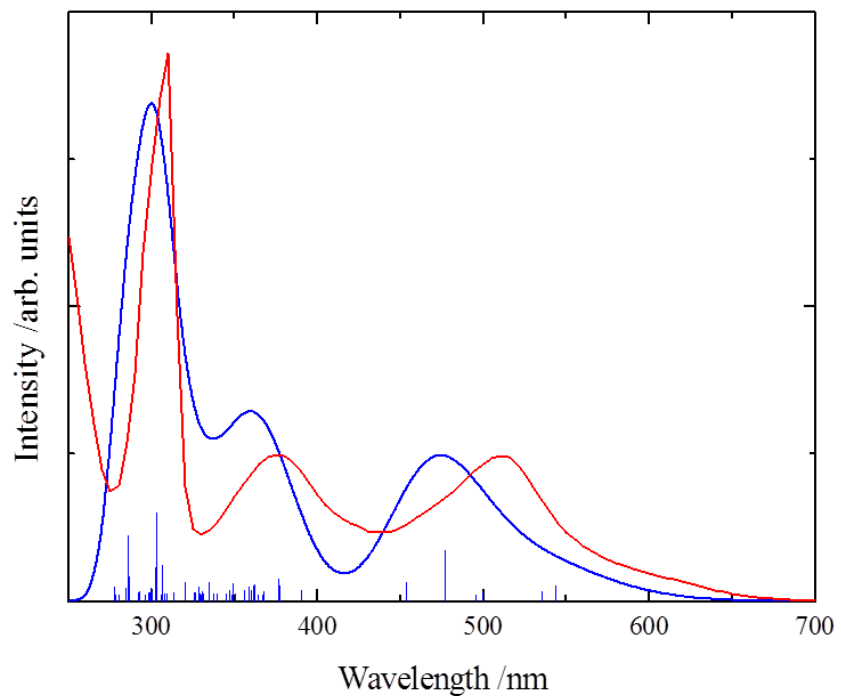

**Figure S10.** Comparison between computed (blue line) and experimental (red line) spectrum of  $\text{N3}^{4-}$ . Blue vertical lines correspond to calculated excitation energies and oscillator strengths for  $\text{N3}^{4-}$ .
